# Supplementary material
Source: publisher figshare collection journal article supplement (https://diabetesjournals.figshare.com/ndownloader/files/28483290)
Supplement: Supplementary file 1 [file 28483290]

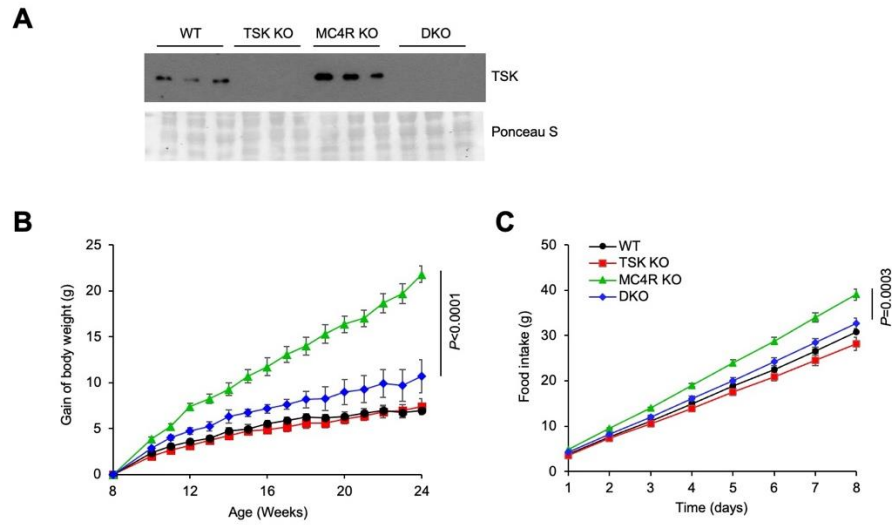

**Supplementary Fig. S1. Body weight gain and cumulative food intake.**

(A) Immunoblot of plasma TSK. (B) Body weight gain in chow-fed WT (n=8), TSK KO (n=9), MC4R KO (n=5), and DKO (n=5) mice. (C) Cumulative food intake in chow-fed WT (n=5), TSK KO (n=6), Mc4r KO (n=6), and DKO (n=5) mice over a period of 8 days. One-way ANOVA; data represent mean  $\pm$  SEM.
